# Supplementary material
Source: PubMed Central journal article supplement (PMC4181708)
Supplement: NIHMS630440-supplement-Suppl_Data.pdf [file NIHMS630440-supplement-Suppl_Data.pdf]

1  
2  
3 Scale bar = 50  $\mu$ m (D) PD0325901 can augment Nanog expression in STAT3<sup>-/-</sup> + DD-STAT3-  
4  
5 S727A mES cells.  
6  
7  
8  
9

10 **Figure 6. Proposed model for the role of differential STAT3 phosphorylation in regulating**  
11 **stem cell fates.** In mESCs, activation of LIF/JAK signaling induces phosphorylation of STAT3  
12 Y705 to maintain self-renewal. Upon withdrawal of LIF from the culture environment, mESCs  
13 differentiate into mEpiSCs concomitant with a switch from LIF/JAK-mediated phosphorylation  
14 of Y705 to FGF/Erk-mediated phosphorylation of S727. In the mEpiSC stage, STAT3 pS727  
15 promotes neural commitment and secures this differentiation-primed state by inhibiting  
16 JAK/pY705-induced reprogramming  
17  
18  
19  
20  
21  
22  
23  
24  
25  
26  
27  
28  
29  
30  
31  
32  
33  
34  
35  
36  
37  
38  
39  
40  
41  
42  
43  
44  
45  
46  
47  
48  
49  
50  
51  
52  
53  
54  
55  
56  
57  
58  
59  
60

## Supplementary figures

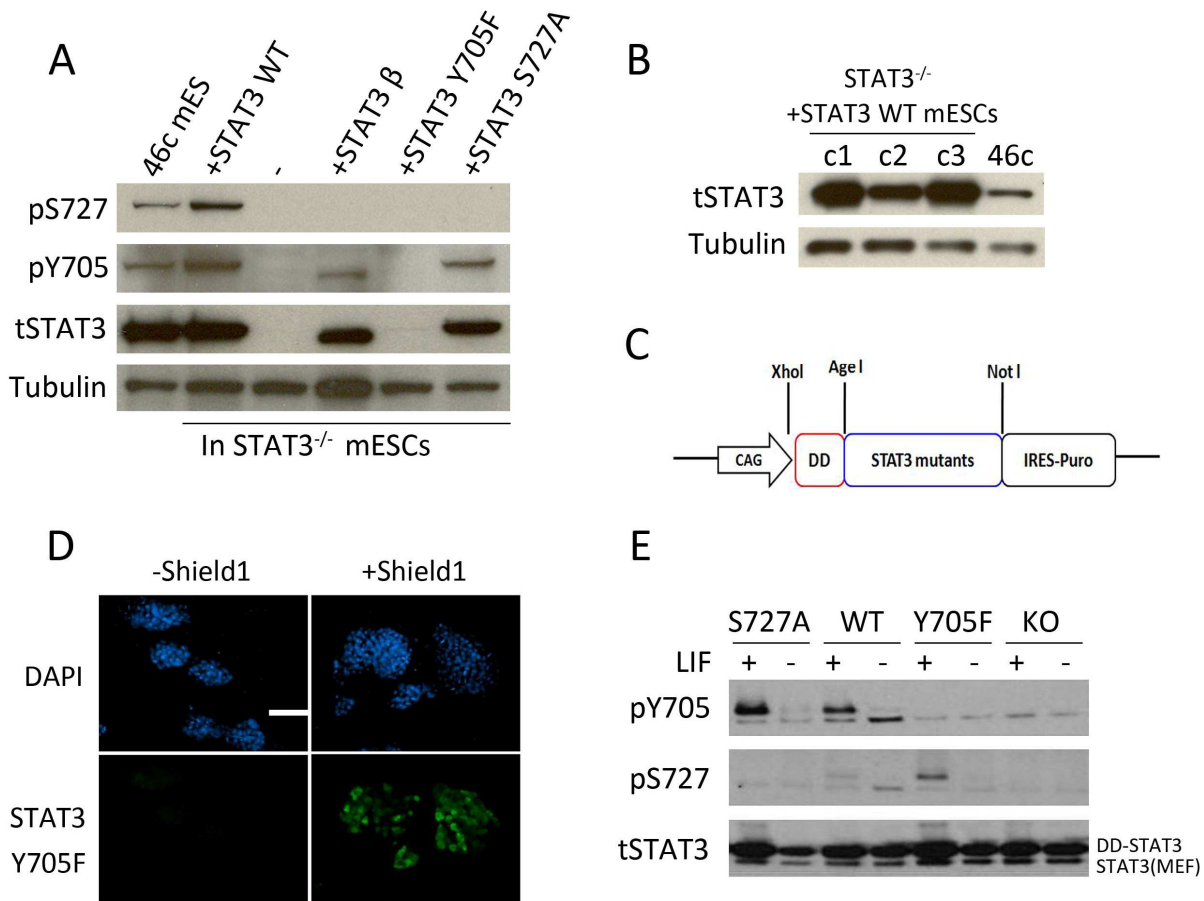

**Figure S1. Stable transfection of STAT3 mutants into STAT3<sup>-/-</sup> mES cells led to aberrant expression of transgenes, so the DD-STAT3 system was used to fine-tune STAT3 quantity.**

(A) **Cytotoxicity** of STAT3-Y705F transgene in STAT3<sup>-/-</sup> mES cells. (B) Aberrant STAT3 expression level in stable STAT3<sup>-/-</sup> + STAT3-WT mES cells. (C) **Diagram showing the DD-STAT3 expression vector used in the following experiments.** (D) Immuno-fluorescence analysis of STAT3 (green) quantity modulated by S1. DAPI stains the nuclei (blue). STAT3<sup>-/-</sup> + DD-STAT3-Y705F mES cells were used as an example. Scale bar = 50 μm (E) Characterization of different STAT3<sup>-/-</sup> + DD-STAT3 mES cells. Cells were cultured in N2B27+2i+S1 medium and

stimulated with LIF for 1 hour before lysates were collected for immunoblotting with pSTAT3 antibodies.

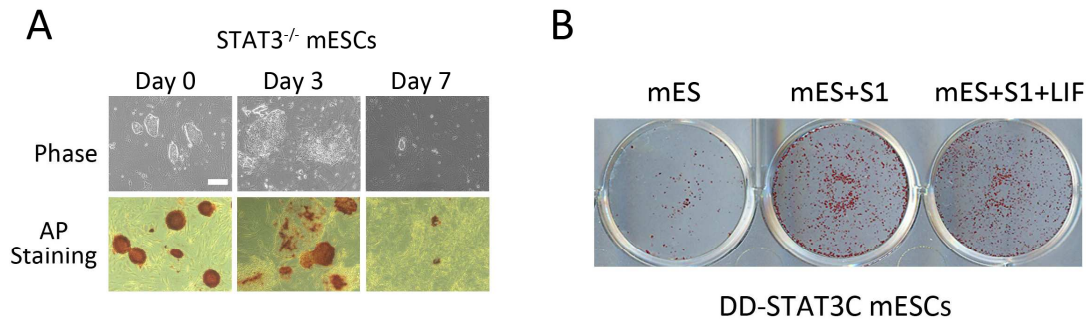

**Figure S2. Self-renewal potential of STAT3<sup>-/-</sup> and STAT3<sup>-/-</sup> + DD-STAT3C mES cells. (A)**

Alkaline phosphatase staining and phase contrast images of STAT3<sup>-/-</sup> mES cells, indicating spontaneous differentiation and death after LIF withdrawal. Scale bar = 50  $\mu$ m (B) Alkaline phosphatase staining of STAT3<sup>-/-</sup> + DD-STAT3C mES cells, indicating self-renewal in the absence of LIF.

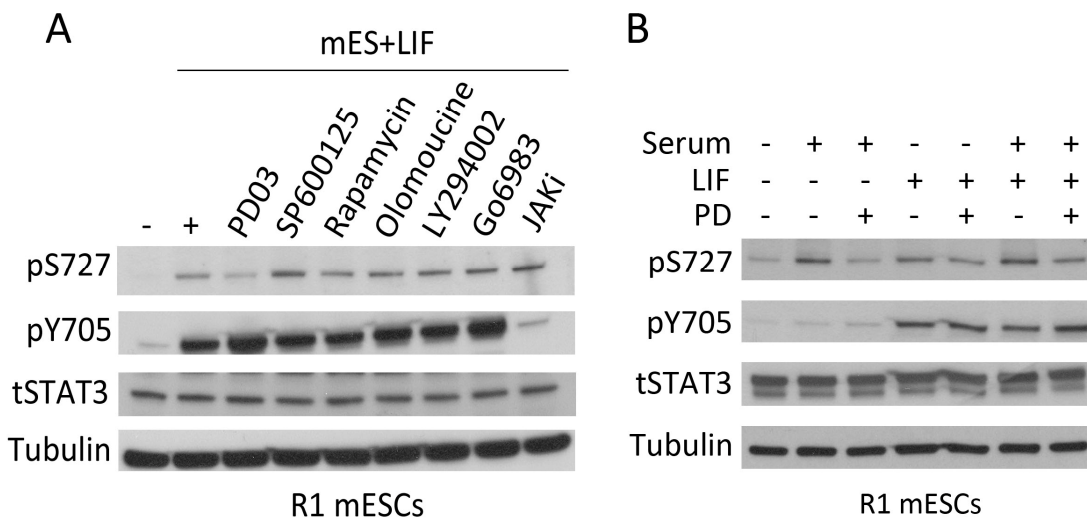

1  
2  
3 **Figure S3. Serum-induced S727 phosphorylation of STAT3 was specifically inhibited by**  
4 **PD0325901 in R1 ES cells.** (A) After overnight starvation with basal medium +S1, cells were  
5  
6 pre-treated with various inhibitors for 2 hours, and then switched to mES+LIF for 1h before  
7  
8 being lysed. (B) Serum and LIF stimulation was applied separately before immunoblot analysis.  
9  
10  
11  
12  
13  
14  
15  
16  
17  
18  
19  
20  
21  
22  
23  
24  
25  
26  
27  
28  
29  
30  
31  
32  
33  
34  
35  
36  
37  
38  
39  
40  
41  
42  
43  
44  
45  
46  
47  
48  
49  
50  
51  
52  
53  
54  
55  
56  
57  
58  
59  
60

For Peer Review
